# Supplementary material for: Gold nanocone arrays directly grown on nickel foam for improved SERS detection of aromatic dyes
Source: Royal Society of Chemistry journal article supplement (doi:10.1039/c8ay00840j), 2018-01-01
Supplement: c8ay00840j1.pdf [file c8ay00840j1.pdf]

## Supporting Information

Gold nanocone array directly grown on nickel foam for improved SERS detection of aromatic dye

Fugang Xu\* , Huasheng Lai, Hui Xu

*College of Chemistry and Chemical Engineering, Jiangxi Normal University, Nanchang 330022, People's Republic of China.*

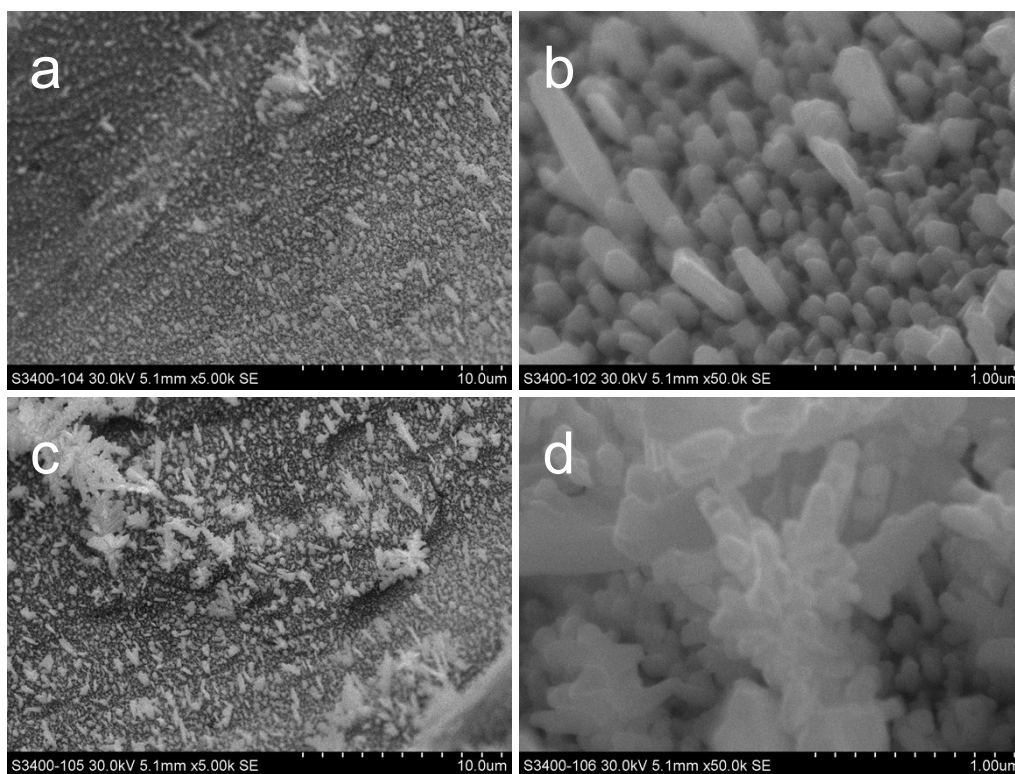

Fig. S1 SEM images of Au micro-nanostructures obtained on Ni foam in the absence of any surfactant.

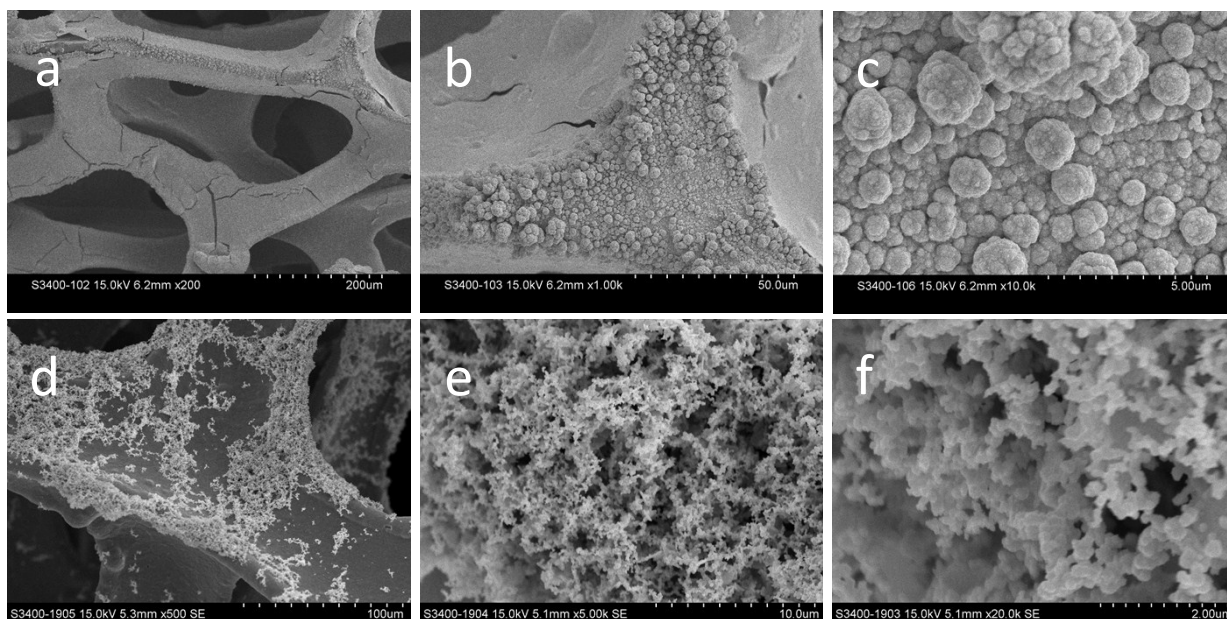

Fig. S2 SEM images of Au micro-nanostructures obtained on Ni foam in the presence of other surfactant (a-c) 20 mg/mL PVP, (d-f) 20 mg/mL sodium citrate.

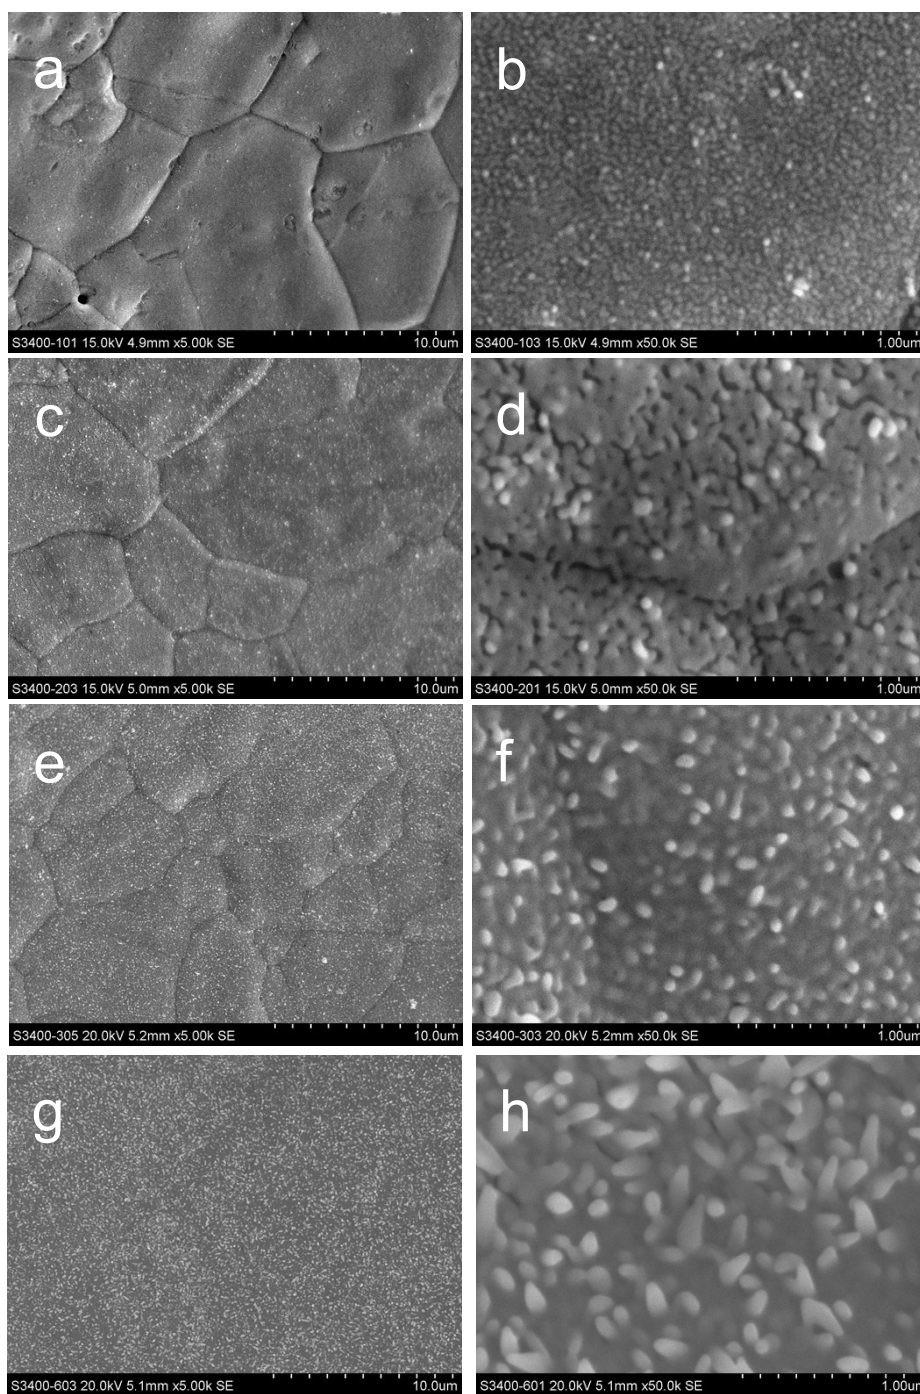

Fig. S3 SEM images of products obtained at different growth time for the reaction between H<sub>2</sub>AuCl<sub>4</sub> and Ni foam in the presence of 20 mg/mL CTAB: (a,b) 1h, (c,d) 2h, (e,f) 4h, and (g, h) 12h.

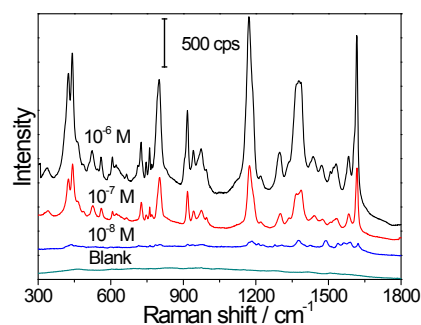

Fig. S4 SERS signal of CV at different concentration obtained on bare Au@Ni foam substrate.

Tab. S1 The assignment of SERS peaks of CV.

| Raman shift of CV (cm <sup>-1</sup> ) | Raman band assignment [1]                       |
|---------------------------------------|-------------------------------------------------|
| ~1582 and 1616                        | Ring C-C stretching                             |
| ~1368 and 1378                        | N-phenyl stretching                             |
| ~1173                                 | Ring C-H in-plane bending                       |
| ~725 and 802                          | Ring C-H out-of -plane bending                  |
| ~ 918                                 | Ring skeletal vibrations of radical orientation |
| ~440                                  | C-N-C bending                                   |
| ~420                                  | Out-of-plane vibrations of phenyl-C-phenyl      |
| ~335                                  | In-plane vibrations of phenyl-C-phenyl          |

Tab. S2 Comparison the SERS detection performance of substrates for CV.

| Substrates             | LOD                      | Ref.      |
|------------------------|--------------------------|-----------|
| Ag-coated cellophane   | 10 <sup>-9</sup> M       | 2         |
| Colloidal silver       | 3.6 x 10 <sup>-9</sup> M | 3         |
| Ag-coated filter paper | 10 <sup>-10</sup> M      | 4         |
| rGO-Ag                 | 10 <sup>-7</sup> M       | 5         |
| AuNCA@Ni foam          | 3 x 10 <sup>-11</sup> M  | this work |

Tab. S3 The assignment of SERS peaks of NB.

| Raman shift of NB (cm <sup>-1</sup> ) | Raman band assignment <sup>[6]</sup> |
|---------------------------------------|--------------------------------------|
| ~1436, 1491 and 1643                  | Ring stretching                      |
| ~1185                                 | C-H bending                          |
| ~664                                  | In-plane CCC or NCC deformations     |
| ~ 591                                 | C-C-C and C-N-C deformations         |
| ~496                                  | C-C-C deformations                   |

## Reference

1. J. Huang, D.Y. Ma, F. Chen, M. Bai, K.W. Xu, and Y.X. Zhao, *Anal. Chem.*, 2015, **87**, 10527-10534.
2. W. Wei, Q. Huang, *Spectrochim. Acta. A*, 2018, **193**, 8-13.
3. B. Liu, W. Jiang, H. Wang, X. Yang, S. Zhang, Y. Yuan, T. Wu, Y. Du, *Microchim. Acta*, 2013, **180**, 997-1004.
4. W. Wei, Q. Huang, *Spectrochim. Acta. A*, 2017, **179**, 211-215.
5. Q. Huang, J. Wang, W. Wei, Q. Yan, C. Wu, X. Zhu, *J. Hazard. Mater.*, 2015, **283**, 123-130.
6. G. Bodelón, V. Montes-García, C. Fernández-López, I. Pastoriza-Santos, J. Pérez-Juste, and L.M. Liz-Marzán, *Small*, 2015, **33**, 4149-4157.
